# Supplementary material
Source: PubMed Central journal article supplement (PMC4534835)
Supplement: bm5b00451_si_001.pdf [file bm5b00451_si_001.pdf]

## Supporting Information

### **A catechol-functionalized synthetic polymer as a dental adhesive to contaminated dentin surface for a composite restoration**

*Sang-Bae Lee<sup>1</sup>, Carlos González-Cabezas<sup>2</sup>, Kwagn-Mhan Kim<sup>1</sup>, Kyoung-Nam Kim<sup>1\*</sup>,  
and Kenichi Kuroda<sup>3\*</sup>*

- 1. <sup>1</sup>H NMR spectra of protected poly(DMA-MEA)(TBDMS)<sub>2</sub> and deprotected poly(DMA-MEA)**
- 2. Lap Shear Strength Data**
- 3. Micro Tensile Bond Strength (μ-TBS) Data.**

1.  $^1\text{H}$  NMR spectra of protected poly(DMA-MEA)(TBDMS) $_2$  and deprotected poly(DMA-MEA)

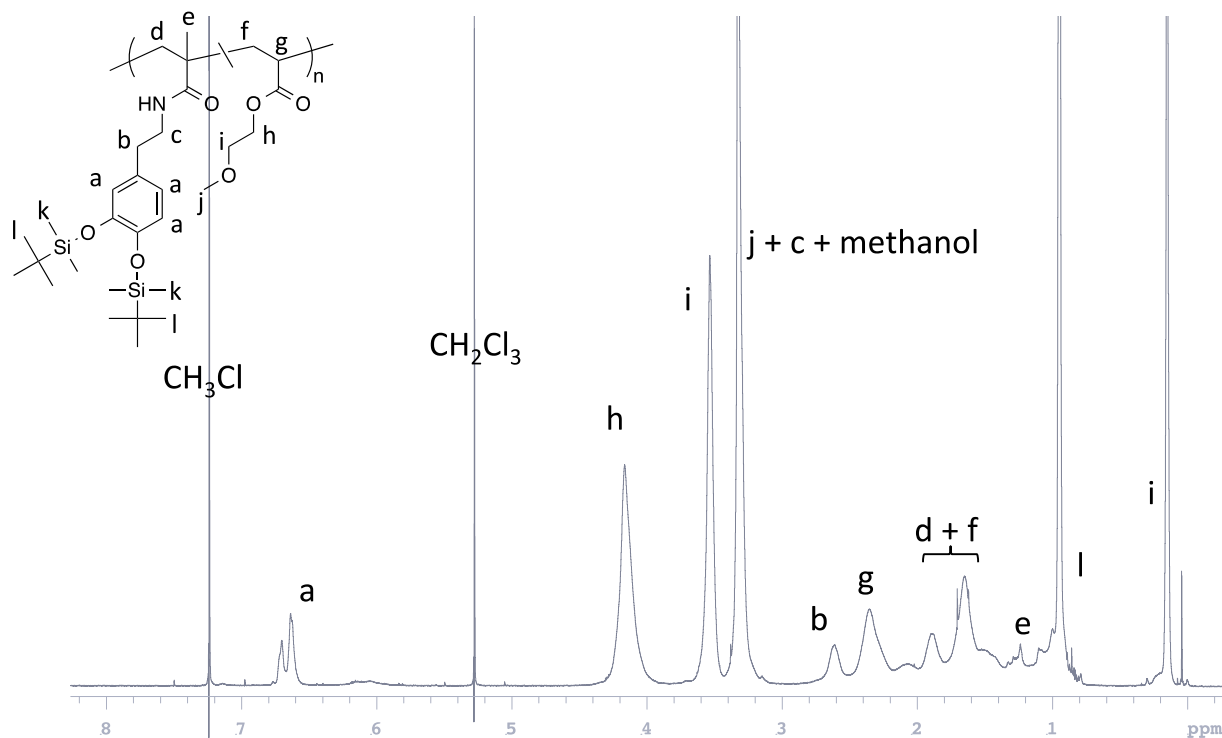

Figure S1.  $^1\text{H}$  NMR spectra of poly(DMA-MEA)(TBDMS) $_2$  in  $\text{CD}_3\text{OD}$ .

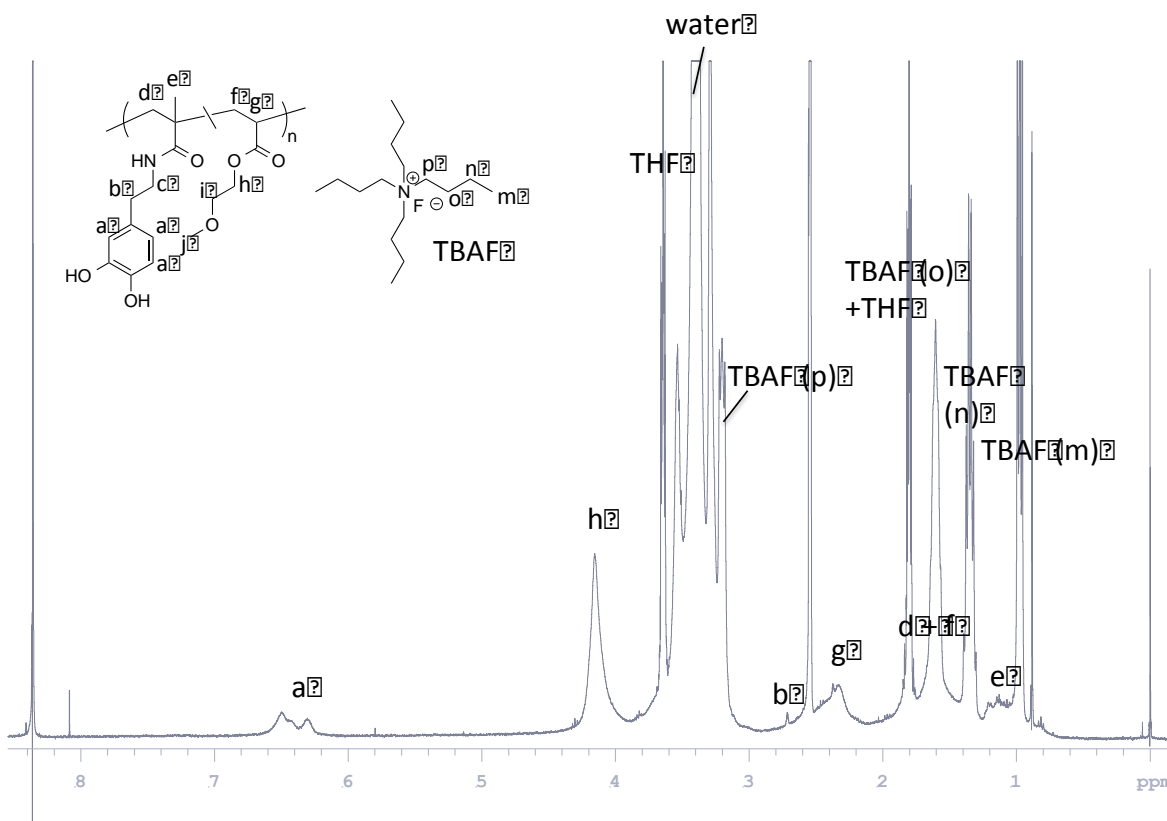

Figure S2.  $^1\text{H}$  NMR spectra of poly(DMA-MEA) in DMSO

## 2. Lap Shear Strength (L-SBS) Data.

**Table S1.** Preparation and bonding strength of poly(DMA-MEA) with various amounts of water

| Substrates | Bonding resin <sup>a)</sup><br>( $\mu\text{g}$ ) | poly(DMA-MEA) <sup>b)</sup><br>( $\mu\text{g}$ ) | D.I. Water <sup>c)</sup><br>( $\mu\text{L}$ ) | Storage condition after bonding <sup>d)</sup> | L-SBS (KPa)         |
|------------|--------------------------------------------------|--------------------------------------------------|-----------------------------------------------|-----------------------------------------------|---------------------|
| Glass      | -                                                | 400                                              | 0.5(0.9)                                      | HV/RT/72 hrs                                  | 106 ( $\pm 36$ )    |
| Glass      | -                                                | 400                                              | 1.0(1.4)                                      | HV/RT/72 hrs                                  | 589 ( $\pm 106$ )   |
| Glass      | -                                                | 400                                              | 2.0(2.4)                                      | HV/RT/72 hrs                                  | 1,164 ( $\pm 163$ ) |
| Glass      | -                                                | 400                                              | 3.0(3.4)                                      | HV/RT/72 hrs                                  | 1,114 ( $\pm 113$ ) |
| Glass      | -                                                | 400                                              | 4.0(4.4)                                      | HV/RT/72 hrs                                  | 1,129 ( $\pm 33$ )  |
| Glass      | 400                                              | -                                                | 0.5                                           | HV/RT/72 hrs                                  | 1,127 ( $\pm 151$ ) |
| Glass      | 400                                              | -                                                | 1.0                                           | HV/RT/72 hrs                                  | 665 ( $\pm 151$ )   |
| Glass      | 400                                              | -                                                | 2.0                                           | HV/RT/72 hrs                                  | 480 ( $\pm 113$ )   |
| Glass      | 400                                              | -                                                | 3.0                                           | HV/RT/72 hrs                                  | 418 ( $\pm 61$ )    |
| Glass      | 400                                              | -                                                | 4.0                                           | HV/RT/72 hrs                                  | 0                   |

a) 2 $\mu\text{L}$  of bonding resin solution in methanol (200 $\mu\text{g}/\text{mL}$ ) was added to glass surfaces.

b) 2 $\mu\text{L}$  of polymer solution in water/methanol (1:4) (200 $\mu\text{g}/\text{mL}$ ) was added to glass surfaces.

c) The amount of water added to the surfaces. The numbers presented in the parenthesis is the total amount of water from 2 $\mu\text{L}$  of polymer solution in water/methanol (1:4) (0.4 $\mu\text{L}$  of water) and added water

d) The prepared glass samples were dried under high vacuum (HV) at room temperature (RT) for 72 hours.

**Table S2.** Preparation and bonding strength of poly(DMA-MEA) with various salivary contaminants and  $\text{Fe}^{3+}$  additive

| Additives (salivary contaminates) | Additive ( $\mu\text{L}$ ) | Polymer <sup>a)</sup><br>( $\mu\text{g}$ ) | Storage condition after bonding <sup>b)</sup> | L-SBS (KPa)         |
|-----------------------------------|----------------------------|--------------------------------------------|-----------------------------------------------|---------------------|
| None <sup>c)</sup>                | 0                          | 800                                        | HV/RT/72 hrs                                  | 136 ( $\pm 28$ )    |
| BSA <sup>d)</sup>                 | 2                          | 800                                        | HV/RT/72 hrs                                  | 357 ( $\pm 94$ )    |
| W/M <sup>e)</sup>                 | 2                          | 800                                        | HV/RT/72 hrs                                  | 326 ( $\pm 85$ )    |
| WO/M <sup>f)</sup>                | 2                          | 800                                        | HV/RT/72 hrs                                  | 913 ( $\pm 176$ )   |
| DI <sup>g)</sup>                  | 2                          | 800                                        | HV/RT/72 hrs                                  | 1,645 ( $\pm 256$ ) |
| Fe <sup>h)</sup>                  | 2                          | 800                                        | HV/RT/72 hrs                                  | 91.9 ( $\pm 23$ )   |

a) 4 $\mu\text{L}$  of polymer solution (200 $\mu\text{g}/\text{mL}$ ) was added to glass surfaces.

b) The prepared glass samples were dried under high vacuum (HV) at room temperature (RT) for 72 hours.

c) None : No treatment to glass surface before the bonding procedure

d) BSA: 35% bovine serum albumin solution

- e) W/M: artificial saliva containing mucin component
- f) WO/M: artificial saliva without mucin component
- g) DI: distilled water
- h) Fe: 80 mM Fe<sup>3+</sup> solution.

### 3. Micro Tensile Bond Strength ( $\mu$ -TBS) Data.

**Table S3.** Comparison in tensile bond strength between poly(DMA-MEA) and commercial adhesives

| Adhesives                              | Tensile bond strength (MPa) |                   |                   |                  |                   |                   |
|----------------------------------------|-----------------------------|-------------------|-------------------|------------------|-------------------|-------------------|
|                                        | None                        | W/M               | WO/M              | BSA              | W/M+Fe            | Fe                |
| AE <sup>c)</sup>                       | 41.8 ( $\pm$ 8.3)           | 8.1 ( $\pm$ 4.9)  | 14.5 ( $\pm$ 8.7) | - <sup>b)</sup>  | 9.1( $\pm$ 0.7)   | 12.5( $\pm$ 2.2)  |
| SE <sup>d)</sup>                       | 12.4 ( $\pm$ 2.8)           | 6.3 ( $\pm$ 1.3)  | 0 <sup>a)</sup>   | - <sup>b)</sup>  | - <sup>b)</sup>   | - <sup>b)</sup>   |
| poly(DMA-MEA)<br>with AE <sup>c)</sup> | 8.4 ( $\pm$ 3.9)            | 12.9 ( $\pm$ 2.6) | - <sup>b)</sup>   | 9.2 ( $\pm$ 2.0) | 17.9 ( $\pm$ 2.5) | 28.8 ( $\pm$ 5.9) |

a) The sample was not bonded.

b) Not detected strength

c) Acid-etching bonding agent (Scotchbond Multi-Purpose<sup>R</sup>)

d) Self-etching bonding agent (BeautiBond<sup>R</sup>)
